# Supplementary material for: Diabetic Retinopathy Is Related to Both Endothelium-Dependent and -Independent Responses of Skin Microvascular Flow
Source: PubMed Central journal article supplement — Diabetes Care. 2011 May 20;34(6):1389–93. doi: 10.2337/dc10-1985 (PMC3114354; doi:10.2337/dc10-1985), 2011-05-20
Supplement: supp_dc10-1985v101985_DC101985SupplementaryData.pdf [file supp_dc10-1985v101985_DC101985SupplementaryData.pdf]

SUPPLEMENTARY DATA

**Supplementary Table 1. Association between skin iontophoretic responses to sodium nitroprusside (SNP) and acetylcholine (ACh) with diabetic retinopathy by persons with type 1 and type 2 diabetes**

| Groups                                           | Range       | DR (%) | Model 1*:                | p-value     | Model 2†:                | p-value     | Model 3‡:                | p-value     |
|--------------------------------------------------|-------------|--------|--------------------------|-------------|--------------------------|-------------|--------------------------|-------------|
|                                                  |             |        | OR (95%CI)               |             | OR (95%CI)               |             | OR (95%CI)               |             |
| <b>Response to SNP (endothelium-independent)</b> |             |        |                          |             |                          |             |                          |             |
| <i>Persons with Type 1 diabetes</i>              |             |        |                          |             |                          |             |                          |             |
| Upper half                                       | 4.70 – 17.2 | 57.5%  | 1.0                      |             | 1.0                      |             | 1.0                      |             |
| Lower half                                       | 1.46 – 4.67 | 70.4%  | 1.46 (0.50, 4.24)        | 0.49        | 1.30 (0.38, 4.43)        | 0.68        | 1.21 (0.34, 4.31)        | 0.77        |
| <i>Persons with Type 2 diabetes</i>              |             |        |                          |             |                          |             |                          |             |
| Upper half                                       | 4.70 – 17.2 | 44.7%  | 1.0                      |             | 1.0                      |             | 1.0                      |             |
| Lower half                                       | 1.46 – 4.67 | 68.7%  | <b>2.59 (1.17, 5.70)</b> | <b>0.02</b> | <b>3.60 (1.19, 10.9)</b> | <b>0.02</b> | <b>3.95 (1.16, 13.4)</b> | <b>0.03</b> |
| <b>Response to ACh (endothelium-dependent)</b>   |             |        |                          |             |                          |             |                          |             |
| <i>Persons with Type 1 diabetes</i>              |             |        |                          |             |                          |             |                          |             |
| Upper half                                       | 6.08 – 20.5 | 53.3%  | 1.0                      |             | 1.0                      |             | 1.0                      |             |
| Lower half                                       | 1.26 – 6.06 | 75.9%  | 2.66 (0.92, 7.68)        | 0.07        | 1.82 (0.53, 6.30)        | 0.35        | 1.65 (0.46, 5.89)        | 0.44        |
| <i>Persons with Type 2 diabetes</i>              |             |        |                          |             |                          |             |                          |             |
| Upper half                                       | 6.08 – 20.5 | 49.0%  | 1.0                      |             | 1.0                      |             | 1.0                      |             |
| Lower half                                       | 1.26 – 6.06 | 66.2%  | 1.86 (0.85, 4.06)        | 0.12        | 1.87 (0.68, 5.13)        | 0.23        | 1.62 (0.56, 4.68)        | 0.37        |
| <b>Response to both SNP and ACh§</b>             |             |        |                          |             |                          |             |                          |             |
| <i>Persons with Type 1 diabetes</i>              |             |        |                          |             |                          |             |                          |             |
| Upper half of both SNP and ACh                   |             | 50.0%  | 1.0                      |             | 1.0                      |             |                          |             |
| Lower half of SNP, upper half of ACh             |             | 61.5%  | 1.28 (0.32, 5.15)        | 0.73        | 1.49 (0.28, 7.92)        | 0.64        |                          |             |

SUPPLEMENTARY DATA

|                                            |       |                          |             |                          |             |  |  |
|--------------------------------------------|-------|--------------------------|-------------|--------------------------|-------------|--|--|
| Upper half of SNP, lower half of ACh       | 73.3% | 2.63 (0.68, 10.3)        | 0.16        | 2.13 (0.44, 10.3)        | 0.34        |  |  |
| Lower half of both SNP and ACh             | 78.6% | 3.18 (0.70, 14.5)        | 0.13        | 1.84 (0.32, 10.7)        | 0.50        |  |  |
| <b><i>Persons with Type 2 diabetes</i></b> |       |                          |             |                          |             |  |  |
| Upper half of both SNP and ACh             | 53.1% | 1.0                      |             | 1.0                      |             |  |  |
| Lower half of SNP, upper half of ACh       | 41.2% | 0.56 (0.16, 1.88)        | 0.35        | 1.23 (0.24, 6.25)        | 0.81        |  |  |
| Upper half of SNP, lower half of ACh       | 26.7% | 0.26 (0.07, 1.05)        | 0.06        | 0.42 (0.08, 2.25)        | 0.31        |  |  |
| Lower half of both SNP and ACh             | 78.0% | <b>2.80 (1.03, 7.61)</b> | <b>0.04</b> | <b>3.90 (1.04, 14.7)</b> | <b>0.04</b> |  |  |

OR: odds ratio; 95%CI: 95% confidence interval.

\*Model 1: Adjusted for age, gender.

†Model 2: Adjusted for covariates in model 1 plus diabetes duration, fasting glucose, total cholesterol and triglycerides levels, body mass index, systolic blood pressure, current smoking status, use of anti-hypertensive and lipid-lowering medications

‡ Model 3: Adjusted for covariates in model 2 plus ACh response with SNP response, or SNP response with ACh response

§Participants divided into four Groups according to response to SNP and ACh (see text)

Significant interaction between responses to sodium nitroprusside and acetylcholine (p for interaction term <0.05)
